# Supplementary material
Source: Elsevier journal article supplement (https://www.sciencedirect.com/science/article/pii/S0213485320301079)
Supplement: mmc1 [file S0213485320301079:mmc1.pdf]

## Headache Specialists Survey

### The Impact of Covid-19 on headache patient care in Spain

Con motivo de la crisis del Covid-19, que está teniendo consecuencias tan profundas en el sistema sanitario español, queremos conocer en qué medida le ha afectado como neurólogo que gestiona una estructura asistencial de atención a pacientes con cefaleas.

Por eso le pedimos que responda esta breve encuesta que hemos preparado. Está dirigida a responsables de estructuras asistenciales de atención a pacientes con cefalea. Nos interesa mucho su opinión, tanto si gestiona una unidad multidisciplinaria como si lo hace con una pequeña consulta monográfica.

Este proyecto ha sido aprobado por la junta directiva de Grupo de Estudio de Cefaleas de la Sociedad Española de Neurología y por el Comité de Ética de la Investigación con Medicamentos del Área de Salud de Valladolid Este (Código PI 20-1759).

***LOS DATOS RECOGIDOS SON ANÓNIMOS Y SE TRATARÁN EN GRUPO. NO SE RECOGERÁ LA IDENTIFICACIÓN NI LA TRAZABILIDAD DE LAS RESPUESTAS INDIVIDUALES CON EL FIN DE RESPETAR LA LEY DE PROTECCIÓN DE DATOS***

## Sección 1

### Definición y características de la estructura asistencial en la que trabaja

**1) Considera que se trata de:**

- Unidad de Cefaleas
- Consulta monográfica de Cefaleas

**2) El área de referencia directa aproximada de su estructura asistencial es (número de habitantes):**

**3) ¿Es referencia para otras áreas de salud?**

- Si
- No

**4) ¿En qué Comunidad Autónoma trabaja?**

- Andalucía
- Aragón
- Asturias
- Baleares
- Canarias
- Cantabria
- Castilla-la Mancha
- Castilla y León
- Cataluña
- Comunidad Valenciana
- Extremadura
- Galicia
- Madrid
- Murcia
- Navarra
- País Vasco
- La Rioja

- 5) **Especifique el número de días a la semana que tienen una agenda de pacientes con Cefalea** (*Escriba el número de días*):
- 6) **Número aproximado de pacientes atendidos al año de PRIMERAS VISITAS**  
(*Escriba el número de pacientes*):
- 7) **Número aproximado de pacientes atendidos al año de REVISIONES** (*Escriba el número de pacientes*):
- 8) **¿Cuántas semanas de lista de espera de PRIMERAS VISITAS tenía usted ANTES de la crisis por el Covid19?** (*aproximadamente*):
- 9) **¿Cuántas semanas de lista de espera de REVISIONES tenía usted ANTES de la crisis por Covid19?** (*aproximadamente*):
- 10) **¿Cuántas semanas de lista de espera de agenda de PROCEDIMIENTOS tenía usted ANTES de la crisis por el Covid19?** (*aproximadamente*):
- 11) **Número de Neurólogos de la plantilla en la estructura que dedican al menos un día a pacientes con Cefaleas** (*Escriba el número de neurólogos*):
- 12) **¿Que tipo de dedicación realizan los Neurólogos de plantilla en la estructura que atienden a pacientes con Cefalea?**
- Parcial
  - Total
- 13) **Número de fellow-ship con dedicación a las Cefaleas en esta estructura:**
- 14) **¿Que tipo de dedicación realizan los becarios en la estructura?**
- Parcial
  - Total
- 15) **¿Dispone de agenda específica de procedimientos (toxina botulínica o bloqueos anestésicos)?**
- Sí
  - No
- 16) **¿Disponía, antes de esta situación, de apoyo de enfermería?** (*señale las que proceda*)
- Consulta presencial
  - Consulta telefónica

- En procedimientos
- No

**17) ¿Participa en ensayos clínicos multicéntricos?**

- Sí
- No

**18) ¿Disponía, antes de esta situación, de algún sistema de telemedicina? (Señale las que proceda)**

- Correo electrónico
- Web
- Teléfono
- Plataforma del hospital
- Otro:

## Sección 2

### Impacto de la pandemia COVID-19 en su estructura asistencial

**1) ¿Ha tenido alguna limitación en la actividad habitual relacionada con la atención a pacientes con Cefalea?**

- Si
- No

**2) De forma aproximada, ¿qué porcentaje de actividad ha tenido que cancelar?**

**3) Motivos por los que se ha limitado la actividad habitual (*señale las que proceda*):**

- Se ha considerado aconsejable el confinamiento de los pacientes con cefalea
- Se ha redistribuido el personal para dar asistencia a otras áreas de neurología
- Se ha redistribuido al personal en equipos de atención covid
- Se han producido bajas en el personal por enfermedad covid
- Se ha considerado aconsejable el confinamiento preventivo de parte del equipo
- Otro:

**4) Con respecto al mantenimiento de la actividad de atención a pacientes con Cefaleas**

**(*señale las que proceda*):**

- He seguido indicaciones de la dirección del hospital
- He seguido indicaciones de la jefatura de servicio
- He tenido opción de autogestionarla como responsable de la Unidad
- He seguido indicaciones de la Consejería
- Otro:

**5) ¿Ha mantenido consulta presencial a pacientes con Cefalea?**

- Sin cambios
- Sólo pacientes urgentes o preferentes
- Ninguna

**6) ¿Ha mantenido consulta de procedimientos (*Toxina botulínica o bloqueos anestésicos*)**

- Sin cambios
- Sólo pacientes urgentes o preferentes

- Ninguna

**7) ¿Ha iniciado nuevos tratamientos con anticuerpos monoclonales?**

- Sí
- No

**8) En caso de haber iniciado nuevos tratamientos con anticuerpos monoclonales, ¿Cómo ha llevado a cabo la educación a los pacientes?**

- Presencial
- Telemedicina
- Se ha desplazado personal a su domicilio

**9) En pacientes en tratamiento previo con monoclonales, señale las que procedan:**

- Se han mantenido las visitas de seguimiento presenciales
- Se han realizado visitas de seguimiento por telemedicina
- Los pacientes han seguido acudiendo al hospital a recoger medicación
- Se ha establecido algún sistema de envío a domicilio de la medicación

**10) ¿Ha incluido o randomizado nuevos pacientes en ensayos clínicos?**

- Si
- No

**11) ¿Ha mantenido visitas de seguimiento en ensayos clínicos? (señale las que proceda):**

- Sí, presenciales
- Sí, por telemedicina
- No

**12) ¿Desde su estructura asistencial ha llamado por teléfono a pacientes a los que se cancelaron visitas? (señale las que proceda):**

- A primeras visitas
- A revisiones
- A pacientes de consulta de procedimientos
- A pacientes de consulta de monoclonales

**13) ¿Ha habido posibilidad de que los pacientes con Cefaleas contacten por teléfono con personal?**

- No

- Hemos suspendido las consultas telefónicas previas
- Hemos mantenido las consultas telefónicas previas
- Hemos aumentado las consultas telefónicas previas

**14) ¿Ha tenido algún sistema de telemedicina con atención primaria o urgencias para pacientes con Cefaleas?**

- No
- Hemos suspendido la oferta previa
- Hemos reducido la oferta previa
- Hemos mantenido la oferta previa
- Hemos aumentado la oferta previa

**15) ¿Ha informado en redes sociales sobre el acceso a su nueva estructura de atención a pacientes con Cefalea?**

- Sí
- No

**16) ¿Ha difundido en redes sociales las recomendaciones para pacientes con Cefaleas publicadas por GECSSEN en la página web de la SEN?**

- Sí
- No

## Sección 3

### Valoración de la situación clínica de sus pacientes con cefalea

**1) ¿Cómo percibe, en general, que está siendo la evolución de los pacientes con Cefaleas relación con el confinamiento?**

- Mejor
- Sin cambios
- Peor

**2) ¿Cuánto cree que va a empeorar la situación de sus pacientes con Cefaleas después de la crisis del Covid19?**

0 = nada, 10 = lo máximo posible

**3) ¿Cómo percibe que han reaccionado, como media, los pacientes a los cambios que se han producido en su asistencial?**

- Favorablemente
- Negativamente
- Hay de todo



## Sección 4

### Previsión del impacto de la pandemia COVID-19 en su estructura en un futuro y implementación de la telemedicina

**1) ¿Cree que podrá afrontar la vuelta a la normalidad con los medios actuales? (señale las que proceda):**

- Sí
- Necesitaré más personal médico
- Necesitaré más personal de enfermería

**2) ¿Cómo cree que se modificará la lista de espera media en PRIMERAS VISITAS**

**DESPUÉS de la crisis por el Covid19?**

- No se modificará
- Aumentará discretamente
- Aumentará ostensiblemente

**3) ¿Cómo cree que se modificará la lista de espera media en REVISIONES DESPUÉS de la crisis por el Covid19?**

- No se modificará
- Aumentará discretamente
- Aumentará ostensiblemente

**4) ¿Cómo cree que se modificará la lista de espera media en PROCEDIMIENTOS**

**DESPUÉS de la crisis por el Covid19?**

- No se modificará
- Aumentará discretamente
- Aumentará ostensiblemente

**5) ¿Cómo cree que evolucionará la lista de espera de consulta de anticuerpos monoclonal DESPUÉS de la crisis por el Covid19?**

- No se modificará
- Aumentará discretamente
- Aumentará ostensiblemente

**6) ¿Cómo cree que se modificarán las restricciones en su hospital para iniciar nuevos tratamientos con anticuerpos monoclonales?**

- No se modificará
- Se harán más restrictivos
- Se harán más permisivos

**7) ¿Pretende incrementar la consulta de enfermería tras la pandemia?**

- Lo haré
- Me gustaría
- No

**8) ¿Pretende incrementar la telemedicina con atención primaria o urgencias tras la pandemia?**

- Lo haré
- Me gustaría
- No

**9) Tras la pandemia, en su opinión, su estructura asistencial en Cefaleas:**

- Se reforzará
- Se mantendrá igual
- Se debilitará

**10) En su opinión, después de esto, los pacientes *(señale las que proceda)*:**

- Seguirán conformes con el sistema de atención previa
- Nos pedirán mayor cantidad de telemedicina
- Nos pedirán mayor número de visitas presenciales

**11) ¿Cómo cree que va a cambiar su asistencia en esta estructura dedicada a la atención pacientes con Cefalea DESPUÉS de la crisis Covid19? *Por favor, explique...***

**12) ¿Cree a partir de ahora su asistencia en esta estructura va a precisar material de protección personal?**

- Sí
- No

**13) ¿Qué otras estrategias tiene previsto implementar para paliar los efectos producidos por esta crisis? *Por favor, explique...***

**14) ¿La parece adecuada la realización de esta encuesta en este momento?**

- Sí
- No

**15) ¿Cree que los resultados de esta encuesta tendrán algún tipo de utilidad práctica?**

- Sí
- No

**16) Nos gustaría saber si tiene algún comentario adicional. *Por favor, explique...***

**Gracias por tomarse tiempo para completar esta encuesta**
